# Supplementary material
Source: Springer Nature journal article supplement (https://www.springermedizin.de/resource/supplementary/12967_2012_1410_MOESM6_ESM.pdf/9574396)

# TNF- $\alpha$ -308

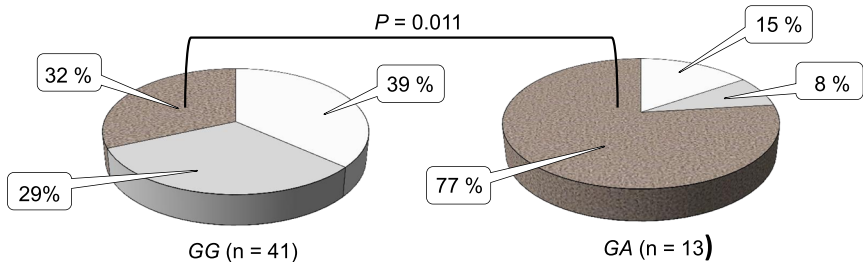

# LT- $\alpha$ +252

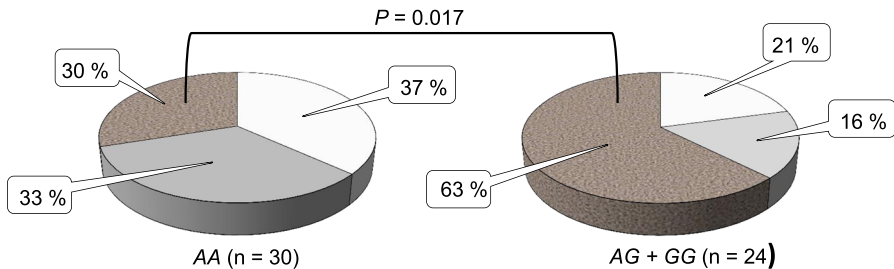

Normal bone density

Mild BMD reduction

Osteoporosis

Supplement: MOESM6 [file 9574396]
